# Supplementary material for: A flexible approach to identify interaction effects between moderators in meta‐analysis
Source: PubMed Central journal article supplement (PMC6590644; doi:10.1002/jrsm.1334), 2019-01-09
Supplement: JRSM-10-134-s001.pdf [file JRSM-10-134-s001.pdf]

## A The non-central $t$ -distribution of SMD effect size

628

In studies that compare treatment and control groups with respect to some continuous outcome variable, standardized mean difference (SMD) is commonly chosen as the measure of effect size. Several measures are available to compute the SMD, of which the most popular one is Cohen's  $d$ .<sup>17</sup> It is computed as the mean difference between the treatment and control group divided by the pooled standard deviation leading to the estimator:

629

630

631

632

633

$$d_k = \frac{\bar{Y}_k^T - \bar{Y}_k^C}{S_k}, \quad (17)$$

where  $\bar{Y}_k^T$  and  $\bar{Y}_k^C$  denote, respectively, the mean of the treatment group and control group of the  $k^{\text{th}}$  study, for  $k = 1, \dots, K$ , with  $K$  being the total number of studies in the meta-analysis.  $S_k$  is the pooled standard deviation of the  $k^{\text{th}}$  study. This standard deviation is computed as

634

635

636

$$S_k = \sqrt{\frac{(n_k^T - 1)(S_k^T)^2 + (n_k^C - 1)(S_k^C)^2}{n_k^T + n_k^C - 2}}, \quad (18)$$

where  $n_k^T$ ,  $n_k^C$ ,  $S_k^T$ , and  $S_k^C$  are, respectively, the treatment and control group sample sizes and standard deviations of the  $k^{\text{th}}$  study (also see Cohen<sup>17</sup>).

637

638

When sample sizes of the individual studies are not sufficiently large, the SMDs are positively biased. Therefore, Hedges<sup>33</sup> introduced a modified estimator for the SMD with a correction for small sample size. This modified estimator is sometimes referred as Hedges'  $g$ ,<sup>33</sup> and it is given by

639

640

641

$$g_k = d_k \cdot c(m_k), \quad (19)$$

where  $m_k = n_k^T + n_k^C - 2$ .  $c(m_k)$  only depends on  $m_k$  and can be computed by

642

$$c(m_k) = \frac{\Gamma(m_k/2)}{\sqrt{m_k/2} \Gamma((m_k - 1)/2)}. \quad (20)$$

The constant  $c(m_k)$  is less than unity and approaches unity when  $m_k$  is large. It can be closely approximated by

643

644

$$c(m_k) \approx 1 - \frac{3}{4m_k - 1}. \quad (21)$$

The SMD is not normally distributed. In fact, it is closely related to a non-central  $t$ -distribution

645

$$c(m_k)^{-1} (\tilde{n}_k)^{1/2} g_k \sim t_{m_k}(\delta_k \sqrt{\tilde{n}_k}), \quad (22)$$

where  $\delta_k$  is the true effect size of the  $k^{\text{th}}$  study, and  $\tilde{n}_k = (n_k^T n_k^C) / (n_k^T + n_k^C)$ .

646

## 647 B The effect sizes of the design factors

648 The partial  $\eta^2$ s of the design factors in the ANOVA are shown in Tables 5-10. Only the ten most  
 649 influential factors are shown for each analysis.

Table 5: Five most influential factors in the ANOVA on Type I error rate for FE meta-CART

| The name of predictor variable | generalized partial $\eta^2$ |
|--------------------------------|------------------------------|
| $K$                            | 0.70                         |
| $c$                            | 0.39                         |
| $K \times c$                   | 0.06                         |
| $M$                            | 0.04                         |
| $\sigma_\tau^2$                | 0.03                         |

Table 6: Five most influential factors in the ANOVA on Type I error rate for RE meta-CART

| The name of predictor variable | generalized partial $\eta^2$ |
|--------------------------------|------------------------------|
| $K \times c$                   | 0.57                         |
| $K$                            | 0.27                         |
| Variable type                  | 0.04                         |
| $c$                            | 0.04                         |
| $M$                            | 0.03                         |

Table 7: Ten most influential factors in the ANOVA on power rate for FE meta-CART

| The name of predictor variable                          | partial $\eta^2$ |
|---------------------------------------------------------|------------------|
| Tree complexity                                         | <b>0.97</b>      |
| $\delta_I$                                              | <b>0.95</b>      |
| $K$                                                     | <b>0.92</b>      |
| $\sigma_\tau^2$                                         | <b>0.85</b>      |
| $\bar{n}$                                               | 0.75             |
| Variable type                                           | 0.71             |
| Variable type $\times$ Tree complexity                  | 0.60             |
| $K \times \delta_I \times$ Tree complexity              | 0.52             |
| Variable Types $\times \delta_I \times$ Tree complexity | 0.50             |
| $\delta_I \times \sigma_\tau^2$                         | 0.49             |

Table 8: Ten most influential factors in the ANOVA on power rate for RE meta-CART

| The name of predictor variable                  | partial $\eta^2$ |
|-------------------------------------------------|------------------|
| Tree complexity                                 | <b>0.98</b>      |
| $\delta_I$                                      | <b>0.96</b>      |
| $K$                                             | <b>0.91</b>      |
| Variable type                                   | <b>0.88</b>      |
| $\sigma_\tau^2$                                 | <b>0.86</b>      |
| $\bar{n}$                                       | <b>0.82</b>      |
| $K \times \sigma_\tau^2 \times$ Tree complexity | 0.64             |
| Variable type $\times$ Tree complexity          | 0.64             |
| $\delta_I \times \sigma_\tau^2$                 | 0.44             |
| $\delta_I \times$ Tree complexity               | 0.43             |

Table 9: Ten most influential factors in the ANOVA on recovery rate of moderators for FE meta-CART

| The name of predictor variable         | partial $\eta^2$ |
|----------------------------------------|------------------|
| Tree complexity                        | <b>0.99</b>      |
| $K$                                    | <b>0.96</b>      |
| $\delta_I$                             | <b>0.95</b>      |
| $\sigma_\tau^2$                        | <b>0.88</b>      |
| Variable type                          | <b>0.85</b>      |
| $\bar{n}$                              | 0.79             |
| $M$                                    | 0.70             |
| Variable type $\times$ Tree complexity | 0.70             |
| $\delta_I \times \sigma_\tau^2$        | 0.63             |
| $K \times$ Tree complexity             | 0.60             |

Table 10: Ten most influential factors in the ANOVA on recovery rate of moderators for RE meta-CART

| The name of predictor variable         | partial $\eta^2$ |
|----------------------------------------|------------------|
| Tree complexity                        | <b>0.99</b>      |
| $\delta_I$                             | <b>0.96</b>      |
| $K$                                    | <b>0.94</b>      |
| Variable type                          | <b>0.90</b>      |
| $\sigma_\tau^2$                        | <b>0.89</b>      |
| $\bar{n}$                              | <b>0.85</b>      |
| Variable type $\times$ Tree complexity | 0.73             |
| $M$                                    | 0.63             |
| $\delta_I \times \sigma_\tau^2$        | 0.55             |
| $\delta_I \times$ Tree complexity      | 0.50             |

Table 11: Ten most influential factors in the ANOVA on difference in average recovery rates between FE meta-CART and FE meta-regression

| The name of predictor variable | partial $\eta^2$ |
|--------------------------------|------------------|
| Tree complexity                | <b>0.96</b>      |
| $K$                            | 0.69             |
| $\sigma_\tau^2$                | 0.65             |
| Variable type                  | 0.62             |
| $K \times \delta_I$            | 0.58             |
| $M$                            | 0.48             |
| $K \times \bar{n}$             | 0.35             |
| $\bar{n}$                      | 0.19             |
| $\delta_I$                     | 0.18             |
| <b>R</b>                       | 0.01             |

Table 12: Ten most influential factors in the ANOVA on difference in average recovery rates between RE meta-CART and RE meta-regression

| The name of predictor variable | partial $\eta^2$ |
|--------------------------------|------------------|
| Tree complexity                | <b>0.93</b>      |
| Variable type                  | 0.76             |
| $M$                            | 0.31             |
| $K \times \delta_I$            | 0.30             |
| $K \times \bar{n}$             | 0.09             |
| $K$                            | 0.08             |
| $\delta_I$                     | 0.03             |
| $\bar{n}$                      | 0.01             |
| <b>R</b>                       | 0.00             |
| $\sigma_\tau^2$                | 0.00             |

## C Two representations for model D

650

In the simulation study, a model with two two-way interactions (model D) was used to generate data  
with complex interaction effects. This tree model can be represented in two trees with different number  
of splits. The number of the splits depends on the first splitting variable.

651

652

653

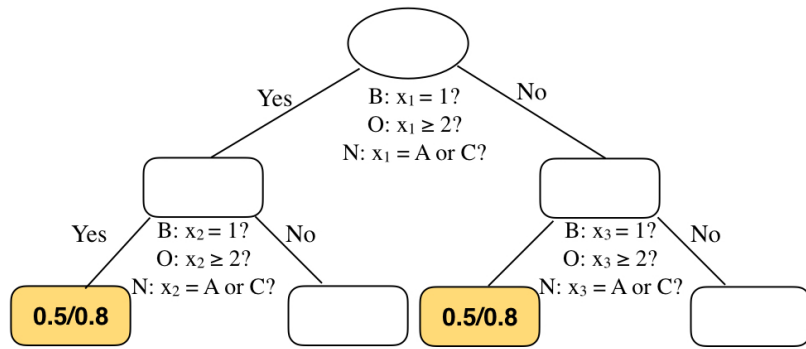

(a)

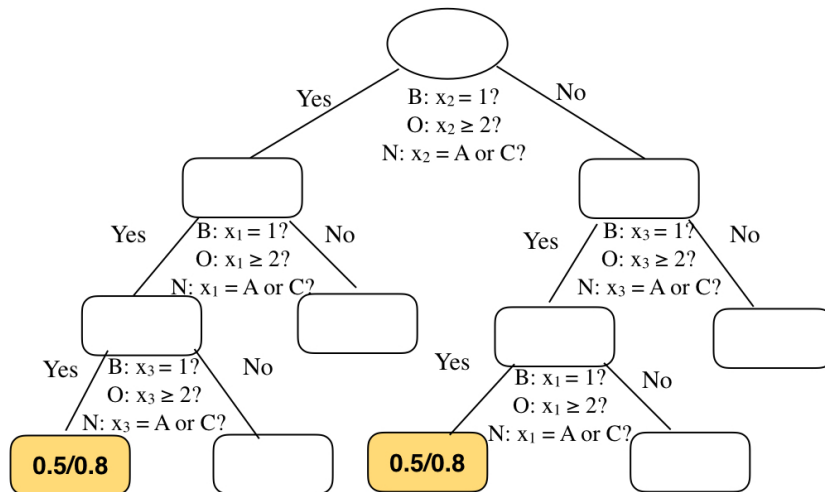

(b)

Figure 7: Two equivalent expressions for model D. The different number of splits depend on the first splitting variable.
